# Supplementary material
Source: MDPI journal article supplement (https://www.mdpi.com/1999-4907/9/4/190)
Supplement: s1 [file s1]

| **Variable** | **FDI** | | | **FDIac** | | |
| --- | --- | --- | --- | --- | --- | --- |
| **Veg_Reg / Goodness of fit statistic** | ***R2*** | ***RMSE*** | ***Bias*** | ***R2*** | ***RMSE*** | ***Bias*** |
| **FOR_C** | 0.19 | 60.54 | 0.96 | 0.51 | 47.01 | 0.85 |
| **FOR_NC** | 0.38 | 8.78 | 1.29 | 0.39 | 8.95 | 0.05 |
| **FOR_NE** | 0.36 | 44.18 | 0.18 | 0.39 | 46.54 | -0.12 |
| **FOR_NW** | 0.35 | 45.42 | 1.14 | 0.74 | 28.80 | 1.54 |
| **FOR_S** | 0.13 | 76.17 | 0.84 | 0.45 | 60.53 | 2.08 |
| **WTROPF_S** | 0.48 | 65.28 | -0.83 | 0.48 | 65.26 | -0.80 |
| **SDTROPF_S** | 0.38 | 87.89 | -0.77 | 0.36 | 69.47 | -2.48 |
| **SWTROPF_S** | 0.30 | 31.06 | 0.13 | 0.46 | 27.34 | -0.57 |
| **DTROPF_C** | 0.21 | 53.07 | 0.34 | 0.50 | 42.43 | 0.16 |
| **DTROPF_NE** | 0.40 | 16.12 | 0.55 | 0.40 | 16.40 | 2.12 |
| **DTROPF_NW** | 0.39 | 19.96 | 1.30 | 0.40 | 19.64 | 0.53 |
| **DTROPF_S** | 0.53 | 56.81 | -1.22 | 0.53 | 60.88 | 0.14 |
| **AGR_C** | 0.31 | 32.23 | -0.60 | 0.54 | 26.69 | 3.05 |
| **AGR_NE** | 0.52 | 12.99 | 1.14 | 0.53 | 14.18 | 3.58 |
| **AGR_NW** | 0.23 | 18.84 | -0.05 | 0.27 | 18.52 | 1.78 |
| **AGR_S** | 0.44 | 51.49 | -2.12 | 0.55 | 45.92 | 1.52 |
| **WET_S** | 0.13 | 58.58 | -0.09 | 0.35 | 51.10 | 3.05 |
| **NATPAS_C** | 0.28 | 32.50 | 0.56 | 0.52 | 26.54 | 1.34 |

**Table S1. Goodness of fit statistics for non-linear models for prediction of Fire Hotspots Density from FDI (eq. 8) and from AcFDI (eq. 9).** Where: Veg_Reg: Vegetation type and region*; R2*: coefficient of determination; *RMSE:* Root Mean Square Error (FHD units, Equation 1); *Bias:* model bias (FHD units, Equation 1); FOR: temperate forest; DTROPF: Dry Tropical Forest; WTROPF: Wet Tropical Forest; SDTROPF: Seasonally Dry Tropical Forest; SWTROPF: Seasonally Wet Tropical Forest; WET: wetlands; AGR: agriculture; NPAS: natural pastureland; NW, NE, C, NC, S: Northwest, Northeast, Center, North-Center and South regions.

**Figure 4.** Observed Fuel dryness Index (FDI) for agricultural crops of the Northwest (NW), Northeast (NE), Centre (C) and South (S) regions. Where: FDI: Fuel dryness Index; AGR: agricultural crops.

**Figure 5.** Predicted and observed Fire Hotspot Density with the best fit mode for four vegetation types. Where: AGR: agriculture; NW, NE, C, S: Northwest, Northeast, Centre and South regions, respectively. PREDpxx: Predicted values with the xx best fit percentile; OBS: Observed values. FHD: Fire Hotspot Density index **(**eq. 1 for observed values; eq. 10, with coefficients from table 2 for predicted values).
